# Supplementary material for: Comparison of the Effects of Intermittent Energy Restriction and Continuous Energy Restriction among Adults with Overweight or Obesity: An Overview of Systematic Reviews and Meta-Analyses
Source: Nutrients. 2022 May 31;14(11):2315. doi: 10.3390/nu14112315 (PMC9183159; doi:10.3390/nu14112315)
Supplement: Supplementary file 1 [file nutrients-14-02315-s001.zip › Supplementary Materials S3. Information of excluded RCTs.pdf]

### Supplementary Materials S3. Information of excluded RCTs

| Author, year   | Title                                                                                                                                                                                                | Intervention                                                                                                      | Comparison                                                                           | Reason for exclusion                                                                   |
|----------------|------------------------------------------------------------------------------------------------------------------------------------------------------------------------------------------------------|-------------------------------------------------------------------------------------------------------------------|--------------------------------------------------------------------------------------|----------------------------------------------------------------------------------------|
| Heilbronn 2006 | Effect of 6-Month Calorie Restriction on Biomarkers of Longevity, Metabolic Adaptation, and Oxidative Stress in Overweight Individuals A Randomized Controlled Trial                                 | CR with exercise                                                                                                  | Weight maintenance diet                                                              | Neither intervention nor comparison meets the inclusion criteria.                      |
| Cho 2019       | Effects of alternate day fasting and exercise on cholesterol metabolism in overweight or obese adults: a pilot randomized controlled trial.                                                          | <ul style="list-style-type: none"> <li>● ADF and exercise (E-ADF);</li> <li>● ADF;</li> <li>● Exercise</li> </ul> | Ad libitum                                                                           | The Comparison is not CER.                                                             |
| Chow 2019      | Time restricted eating (TRE) promotes weight loss, alters on basal metabolism, maximal strength, body composition, inflammation, and cardiovascular risk                                             | TRF                                                                                                               | Ad libitum                                                                           | The Comparison is not CER.                                                             |
| Brehm 2003     | A Randomized Trial Comparing a Very Low Carbohydrate Diet and a Calorie-Restricted Low Fat Diet on Body Weight and Cardiovascular Risk Factors in Healthy Women                                      | Very low carbohydrate diet                                                                                        | Calorie-restricted low-fat diet                                                      | Neither intervention nor comparison meets the inclusion criteria.                      |
| Kroeger 2018   | Eating behavior traits of successful weight losers during 12 months of alternate-day fasting: An exploratory analysis of a randomized controlled trial                                               | ADF                                                                                                               | CER                                                                                  | At half of the intervention, it changed the CER to ad libitum in the comparison group. |
| Ash 2003       | Effect of intensive dietetic interventions on weight and glycaemic control in overweight men with Type II diabetes: a randomised trial                                                               | IF: Fasting for 4 consecutive days each week                                                                      | CER                                                                                  | The intervention is not the primary IER protocol.                                      |
| Arguin 2012    | Short- and long-term effects of continuous versus intermittent restrictive diet approaches on body composition and the metabolic profile in overweight and obese postmenopausal women: a pilot study | IF: 5-week energy restriction periods were followed by 5-week weight stabilization periods                        | CER: 15 weeks of energy restriction was followed by 5 weeks of weight stabilization. | The intervention is not the primary IER protocol.                                      |
| Amodio 2016    | Time restricted feeding (TRF) enhances weight loss efficiency in dietary restricted women with metabolic syndrome.                                                                                   | TRF                                                                                                               | Ad libitum                                                                           | The Comparison is not CER.                                                             |
| Bhutani 2013   | Alternate day fasting and endurance exercise combine to reduce body weight and favorably alter plasma lipids in obese humans.                                                                        | <ul style="list-style-type: none"> <li>● ADF plus endurance exercise;</li> <li>● ADF;</li> </ul>                  | Ad libitum                                                                           | The Comparison is not CER.                                                             |

|                |                                                                                                                                                                                                                         |                                                                                                                               |                                         |                                                                   |
|----------------|-------------------------------------------------------------------------------------------------------------------------------------------------------------------------------------------------------------------------|-------------------------------------------------------------------------------------------------------------------------------|-----------------------------------------|-------------------------------------------------------------------|
|                |                                                                                                                                                                                                                         | ● Exercise                                                                                                                    |                                         |                                                                   |
| Byrne 2018     | Intermittent energy restriction improves weight loss efficiency in obese men: the MATADOR study                                                                                                                         | IF: Fasting for four non-consecutive periods of two weeks                                                                     | CER                                     | The intervention is not the primary IER protocol.                 |
| Corley 2019    | Changes in resting energy expenditure with intermittent fasting versus continuous daily restriction-a randomised controlled trial.                                                                                      | 5:2 diet                                                                                                                      | CER                                     | Incomplete article.                                               |
| Coutinho 2017  | Compensatory mechanisms activated with intermittent energy restriction: a randomized control trial.                                                                                                                     | IF: 3 non-consecutive days of partial fasting per week                                                                        | CER                                     | The intervention is not the primary IER protocol.                 |
| De Groot 1989  | Adaptation of energy metabolism of overweight women to alternating and continuous low energy intake.                                                                                                                    | IER                                                                                                                           | /                                       | The study design is non-RCT.                                      |
| Ferraris 2019  | Time restricted feeding in high-level athletes: a pilot study                                                                                                                                                           | TRF                                                                                                                           | Ad libitum                              | The comparison is not CER.                                        |
| Beaulieu 2019  | Matched Weight Loss Through Intermittent or Continuous Energy Restriction Does Not Lead To Compensatory Increases in Appetite and Eating Behavior in a Randomized Controlled Trial in Women with Overweight and Obesity | IF: To consume a very low-calorie diet (75% energy restriction) during the 3 fast days (Saturday, Monday, Wednesday) per week | CER                                     | The intervention is not the primary IER protocol.                 |
| Keogh 2014     | Effects of intermittent compared to continuous energy restriction on short-term weight loss and long-term weight loss maintenance.                                                                                      | IF: CR for 1 week, followed by 1 week of their usual diet                                                                     | CER                                     | The intervention is not the primary IER protocol.                 |
| Hutchison 2019 | Effects of intermittent versus continuous energy intakes on insulin sensitivity and metabolic risk in women with overweight.                                                                                            | IF: Fasting for 3 non-consecutive days/week                                                                                   | CER                                     | The intervention is not the primary IER protocol.                 |
| Molina 2019    | The Mediterranean diet pattern with intermittent semi-fasting may facilitate weight loss: randomised controlled trial.                                                                                                  | Mediterranean diet + semi-fast                                                                                                | Standard hypocaloric Mediterranean diet | Neither intervention nor comparison meets the inclusion criteria. |
| Hill 1989      | Evaluation of an alternating calorie diet with and without exercise in the treatment of obesity.                                                                                                                        | ADF with behavior therapy                                                                                                     | CR with behavior therapy                | Neither intervention nor comparison meets the inclusion criteria. |
| Mraovic 2018   | The effects of different caloric restriction diets on anthropometric and cardiometabolic risk factors in overweight and obese females.                                                                                  | CR alternating daily diets: one day 70% and the following day 30% caloric restriction                                         | CER                                     | The intervention is not the primary IER protocol.                 |

|                  |                                                                                                                                                                                             |                                                                                                                  |                                                                                                                             |                                                                                                |
|------------------|---------------------------------------------------------------------------------------------------------------------------------------------------------------------------------------------|------------------------------------------------------------------------------------------------------------------|-----------------------------------------------------------------------------------------------------------------------------|------------------------------------------------------------------------------------------------|
| Panizza<br>2019  | Effects of intermittent energy restriction combined with a Mediterranean diet on reducing visceral adiposity: A randomized active comparator pilot study.                                   | IER+MED diet                                                                                                     | DASH diet                                                                                                                   | Neither intervention nor comparison meets the inclusion criteria.                              |
| Li 2017          | Effects of A one-week fasting therapy in patients with type-2 diabetes mellitus and metabolic syndrome—a randomized controlled explorative study.                                           | IF: 7 modified fasting days every 4 months period                                                                | Mediterranean diet                                                                                                          | Neither intervention nor comparison meets the inclusion criteria.                              |
| Kahleova<br>2014 | Eating two larger meals a day (breakfast and lunch) is more effective than six smaller meals in a reduced-energy regimen for patients with type 2 diabetes: A randomised crossover study.   | The A6 regimen: consisted of three main meals (breakfast, lunch and dinner), and three smaller snacks in between | The B2 regimen consisted of breakfast (eaten between 06:00 and 10:00 hours) and lunch (eaten between 12:00 and 16:00 hours) | The study design is non-RCT. Neither intervention nor comparison meets the inclusion criteria. |
| Lantz 2003       | Intermittent versus on-demand use of a very low-calorie diet: A randomized 2-year clinical trial                                                                                            | Very-low-calorie diets for 2 weeks every third month                                                             | Very-low-calorie diets whenever their body weight passed an individualized cut-off level                                    | Neither intervention nor comparison meets the inclusion criteria.                              |
| Huffman<br>2012  | Caloric Restriction Alters the Metabolic Response to a Mixed-Meal: Results from a Randomized, Controlled Trial                                                                              | CR and exercise                                                                                                  | CER                                                                                                                         | The intervention combined with physical activity.                                              |
| Moro 2016        | Effects of eight weeks of time-restricted feeding (16/8) on basal metabolism, maximal strength, body composition, inflammation, and cardiovascular risk factors in resistance-trained males | TRF                                                                                                              | Ad libitum                                                                                                                  | The Comparison is not CER.                                                                     |
| Rossner<br>1998  | Intermittent vs continuous VLCD therapy in obesity treatment                                                                                                                                | Intermittent very-low-calorie diet: fasting for three non-consecutive periods of two weeks                       | Continuous very-low-calorie diet                                                                                            | The intervention is not the primary IER protocol.                                              |
| Klempel<br>2012  | Intermittent fasting combined with calorie restriction is effective for weight loss and cardio-protection in obese women                                                                    | IF: severe restriction 1 d per week                                                                              | Ad libitum                                                                                                                  | Neither intervention nor comparison meets the inclusion criteria.                              |
| Stekovic<br>2019 | Alternate day fasting improves physiological and molecular markers of aging in healthy, non-obese humans.                                                                                   | ADF                                                                                                              | Ad libitum                                                                                                                  | The study design is non-RCT. The Comparison is not CER. The subjects are non-obese.            |
| Teng 2011        | Efficacy of fasting calorie restriction on quality of life among aging men.                                                                                                                 | Fasting calorie restriction (FCR)                                                                                | Ad libitum                                                                                                                  | Neither intervention nor comparison meets the inclusion criteria.                              |

|                |                                                                                                                                                                 |                                                                                                                                                                        |                                                                                                     |                                                                                                  |
|----------------|-----------------------------------------------------------------------------------------------------------------------------------------------------------------|------------------------------------------------------------------------------------------------------------------------------------------------------------------------|-----------------------------------------------------------------------------------------------------|--------------------------------------------------------------------------------------------------|
|                |                                                                                                                                                                 | <p>dietary regime: two days of Muslim Sunnah fasting combined with a reduction of 300–500 kcal/d from the habitual energy intake</p>                                   |                                                                                                     |                                                                                                  |
| Teng 2013      | Improvement of metabolic parameters in healthy older adult men following a fasting calorie restriction intervention.                                            | <p>Fasting calorie restriction (FCR) dietary regime: two days of Muslim Sunnah fasting combined with a reduction of 300–500 kcal/d from the habitual energy intake</p> | Ad libitum                                                                                          | Neither intervention nor comparison meets the inclusion criteria.                                |
| Todd 2015      | Weight loss intervention trial comparing intermittent low carbohydrates versus continuous Mediterranean diet.                                                   | <p>Intermittent low-energy diets (ILEDs): 2 days of Optifast and 5 days of a Mediterranean diet/week</p>                                                               | Continuous low-energy diets (CLEDs)                                                                 | The intervention is not the primary IER protocol.                                                |
| Johnson 2007   | Alternate Day Calorie Restriction Improves Clinical Findings and Reduces Markers of Oxidative Stress and Inflammation in Overweight Adults with Moderate Asthma | ADF                                                                                                                                                                    | /                                                                                                   | <p>The study design is non-RCT.</p> <p>The comparison was not mentioned in the study design.</p> |
| Tinsley 2017   | Time-restricted feeding in young men performing resistance training: a randomized controlled trial.                                                             | TRF with resistance training                                                                                                                                           | Normal diet with resistance training                                                                | Interventions of both groups are combined with physical activity.                                |
| Tinsley 2019   | Time-restricted feeding plus resistance training in active females: a randomized trial.                                                                         | TRF with resistance training                                                                                                                                           | Normal diet with resistance training                                                                | Interventions of both groups are combined with physical activity.                                |
| Varady 2011    | Comparison of effects of diet versus exercise weight loss regimens on LDL and HDL particle size in obese adults.                                                | ADF                                                                                                                                                                    | <ul style="list-style-type: none"> <li>● CER;</li> <li>● Exercise;</li> <li>● Ad libitum</li> </ul> | Not provide the mean difference on change from baseline of the IER vs the CER arms.              |
| Varady 2013    | Alternate day fasting for weight loss in normal weight and overweight subjects: a randomized controlled trial.                                                  | ADF                                                                                                                                                                    | Ad libitum                                                                                          | The Comparison is not CER.                                                                       |
| Michalsen 2005 | Mediterranean diet or extended fasting's influence on changing the intestinal                                                                                   | IF: 4 fast days of 85% CR alternated                                                                                                                                   | Mediterranean diet                                                                                  | Neither intervention nor comparison meets the inclusion criteria.                                |

|                |                                                                                                                                                 |                                                                                                                                    |                                                                             |                                                                                       |
|----------------|-------------------------------------------------------------------------------------------------------------------------------------------------|------------------------------------------------------------------------------------------------------------------------------------|-----------------------------------------------------------------------------|---------------------------------------------------------------------------------------|
|                | microflora, immunoglobulin A secretion and clinical outcome in patients with rheumatoid arthritis and fibromyalgia: an observational study      | with 4 feed days of 25% CR                                                                                                         |                                                                             |                                                                                       |
| Williams 1998  | The effect of short periods of caloric restriction on weight loss and glycemic control in type 2 diabetes                                       | Very-low-calorie diet for 5 consecutive days every 5 weeks                                                                         | Very-low-calorie diet for 1 day/week                                        | Neither intervention nor comparison meets the inclusion criteria.                     |
| Hussin 2013    | Efficacy of fasting and calorie restriction (FCR) on mood and depression among ageing men                                                       | Reduction of 300 to 500 kcal/day from participants baseline energy intake combined with two days of Muslim Sunnah fasting per week | Ad libitum                                                                  | Neither intervention nor comparison meets the inclusion criteria.                     |
| Heilbronn 2005 | Alternate-day fasting in nonobese subjects: effects on body weight, body composition, and energy metabolism                                     | ADF                                                                                                                                | /                                                                           | The study design is non-RCT.<br>The comparison was not mentioned in the study design. |
| Wing 1994      | Year-long weight loss treatment for obese patients with type II diabetes: does including an intermittent very-low-calorie diet improve outcome? | A very low-calorie diet of 400 to 500 kcal per day alternating with the balanced low-calorie diet                                  | A balanced low-calorie diet of 1,000 to 1,000 kilocalories (kcal) per day   | The intervention is not the primary IER protocol.                                     |
| Wing 2003      | Prescribed “breaks” as a means to disrupt weight control efforts.                                                                               | To take a 6-week break after the seventh behavioral lesson.                                                                        | To take 2-week breaks after the third, sixth, and ninth behavioral lessons. | Neither intervention nor comparison meets the inclusion criteria.                     |
| Viegner 1990   | Effects of an intermittent, low-fat, low-calorie diet in the behavioral treatment of obesity.                                                   | Behavior therapy plus an intermittent, low-fat, 800-calorie per day diet, used 4 days per week                                     | Behavior therapy plus a continuous 1200-calorie per day                     | Neither intervention nor comparison meets the inclusion criteria.                     |
