# Supplementary material for: Comparison of the Effects of Intermittent Energy Restriction and Continuous Energy Restriction among Adults with Overweight or Obesity: An Overview of Systematic Reviews and Meta-Analyses
Source: Nutrients. 2022 May 31;14(11):2315. doi: 10.3390/nu14112315 (PMC9183159; doi:10.3390/nu14112315)
Supplement: Supplementary file 1 [file nutrients-14-02315-s001.zip › Supplementary Materials S4. Summary of findings from the meta-analysis of the outcomes.pdf]

**Supplementary Materials S4. Summary of findings from the meta-analysis of the outcomes**

**Summary of findings from the meta-analysis for the outcome of body weight (kg)**

| Systematic reviews<br>(First author, year) | Outcome     | Number of participants<br>(studies) | Type of intervention    | Type of comparison               | Anticipated absolute effects (95%CI), P     | Quality of evidence (GRADE) |
|--------------------------------------------|-------------|-------------------------------------|-------------------------|----------------------------------|---------------------------------------------|-----------------------------|
| Headland, 2016                             | Body weight | 433 (7RCTs)                         | 5:2 diet/Other*         | CER/Regular diet/VLED/No control | MD=0.084 (-0.139, 0.308), P=0.458           | Very low quality            |
| Cioffi, 2018                               |             | 666 (10RCTs)                        | 5:2 diet/ADF/Other*     | CER/Regular diet/No control      | WMD=-0.61 (-1.70, 0.47), P=0.27             | Moderate quality            |
| Harris and Hamilton, 2018                  |             | 287 (4RCTs)                         | 5:2 diet/ADF/Other*     | CER                              | WMD=-1.03 (-2.46, 0.40), P=0.156            | Low quality                 |
|                                            |             | 62 (2RCTs)                          | 5:2 diet/ADF/Other*     | Regular diet                     | WMD=-4.14 (-6.30, -1.99), P<0.001           | Very low quality            |
| Harris and McGarty, 2018                   |             | 317 (5RCTs)                         | Other*                  | CER/Regular diet                 | MD=-1.36 (-3.23, 0.51), P=0.15              | Very low quality            |
| Roman, 2019                                |             | 666 (9RCTs)                         | 5:2 diet/Other*         | CER/Regular diet                 | MD=-0.31 (-1.61, 0.98), P=0.64              | Moderate quality            |
| Allaf, 2021                                |             | 719 (10RCTs)                        | 5:2 diet/ADF/Other*     | CER (≤12 weeks)                  | MD=-0.88 (-1.76, 0.00), P=0.05              | Low quality                 |
|                                            |             | 279 (4RCTs)                         | 5:2 diet/ADF/Other*     | CER (>12 weeks)                  | MD=-0.56 (-1.68, 0.56), P=0.33              | Low quality                 |
|                                            |             | 224 (7RCTs)                         | 5:2 diet/ADF/TRF/Other* | Regular diet (≤12 weeks)         | MD=-2.88 (-3.96, -1.80), P < 0.00001        | Very low quality            |
| Guerrero, 2021                             |             | 1275 (17RCTs)                       | 5:2 diet/ADF/Other*     | CER/Regular diet                 | Cohen's d and 95%CI= -2.42 (-3.89, -4.41) # | Moderate quality            |
| He, 2021                                   |             | 850 (11RCTs)                        | 5:2 diet/ADF/Other*     | CER/Regular diet                 | MD=-0.95 (-1.63, -0.27), P=0.006            | Moderate quality            |
| Schwingshackl, 2021                        |             | 991 (13RCTs)                        | 5:2 diet/ADF/Other*     | CER                              | MD= -0.55 (-1.01, -0.09), P=0.02            | Moderate quality            |
|                                            |             | 318 (6RCTs)                         | 5:2 diet/ADF/Other*     | Regular diet                     | MD=-4.83 (-5.46, -4.21), P < 0.00001        | Low quality                 |

Summary of findings from the meta-analysis for the outcome of BMI (kg/m<sup>2</sup>)

| Systematic reviews<br>(First author, year) | Outcome | Number of participants<br>(studies) | Type of intervention    | Type of comparison       | Anticipated absolute effects (95%CI), P   | Quality of evidence (GRADE) |
|--------------------------------------------|---------|-------------------------------------|-------------------------|--------------------------|-------------------------------------------|-----------------------------|
| Allaf, 2021                                | BMI     | 651 (9RCTs)                         | 5:2 diet/ADF/Other*     | CER (≤12 weeks)          | MD=-0.43 (-0.76, -0.10), P=0.01           | Moderate quality            |
|                                            |         | 279 (4RCTs)                         | 5:2 diet/ADF/Other*     | CER (>12 weeks)          | MD=-0.15 (-0.58, 0.29), P=0.51            | Low quality                 |
|                                            |         | 115 (4RCTs)                         | 5:2 diet/ADF/TRF/Other* | Regular diet (≤12 weeks) | MD=-0.92 (-1.36, -0.48), P < 0.00001      | Very low quality            |
| Guerrero, 2021                             |         | 431 (6RCTs)                         | 5:2 diet/ADF/Other*     | CER/Regular diet         | Cohen's d and 95%CI=-0.38 (-2.55, -2.8) # | Moderate quality            |

Summary of findings from the meta-analysis for the outcome of waist circumference (cm)

| Systematic reviews<br>(First author, year) | Outcome                | Number of participants<br>(studies) | Type of intervention    | Type of comparison           | Anticipated absolute effects (95%CI), P    | Quality of evidence (GRADE) |
|--------------------------------------------|------------------------|-------------------------------------|-------------------------|------------------------------|--------------------------------------------|-----------------------------|
| Cioffi, 2018                               | Waist<br>circumference | 385 (5RCTs)                         | 5:2 diet/ADF/Other*     | CER/ Regular diet/No control | MD= -0.17 (-1.74, 1.39), P=0.83            | Very low quality            |
| Harris and Hamilton,<br>2018               |                        | N/A (2RCTs)                         | 5:2 diet/ADF/Other*     | CER                          | WMD=-2.14 (-3.53, -0.75), P=0.002          | Low quality                 |
| Roman, 2019                                |                        | 348 (4RCTs)                         | 5:2 diet/Other*         | CER/Regular diet             | MD=-0.54 (-3.39, 2.31), P=0.71             | Low quality                 |
| Allaf, 2021                                |                        | 557 (8RCTs)                         | 5:2 diet/ADF/Other*     | CER (≤12 weeks)              | MD=-0.83 (-2.11, 0.44), P=0.20             | Moderate quality            |
|                                            |                        | 258 (3RCTs)                         | 5:2 diet/ADF/Other*     | CER (>12 weeks)              | MD=-0.66 (-2.55, 1.23), P=0.49             | Very low quality            |
|                                            |                        | 87 (2RCTs)                          | 5:2 diet/ADF/TRF/Other* | Regular diet (≤12 weeks)     | MD=-4.19 (-6.38, -2.01), P = 0.0002        | Very low quality            |
| Guerrero, 2021                             |                        | 131 (8RCTs)                         | 5:2 diet/ADF/Other*     | CER/Regular diet             | Cohen's d and 95%CI= -0.37 (-4.27, -4.7) # | Low quality                 |
| He, 2021                                   |                        | 319(4RCTs)                          | 5:2 diet/ADF/Other*     | CER/Regular diet             | MD=-0.53 (-2.56, 1.49), P=0.61             | Low quality                 |
| Schwingshackl, 2021                        |                        | 641 (8RCTs)                         | 5:2 diet/ADF/Other*     | CER                          | MD= -0.57 (-1.56, 0.41), P=0.25            | Moderate quality            |
|                                            |                        | 142 (2RCTs)                         | 5:2 diet/ADF/Other*     | Regular diet                 | MD=-1.73 (-3.69, 0.24), P=0.08             | Very low quality            |

Summary of findings from the meta-analysis for the outcome of body composition (kg)

| Systematic reviews<br>(First author, year) | Outcome | Number of participants<br>(studies) | Type of intervention | Type of comparison           | Anticipated absolute effects (95%CI), P               | Quality of evidence (GRADE) |
|--------------------------------------------|---------|-------------------------------------|----------------------|------------------------------|-------------------------------------------------------|-----------------------------|
| Cioffi, 2018                               | FM      | 476 (7RCTs)                         | 5:2 diet/ADF/Other*  | CER/ Regular diet/No control | WMD=-0.23 (-1.23, 0.77), P=0.66                       | Moderate quality            |
| Harris and Hamilton, 2018                  |         | N/A (2RCTs)                         | 5:2 diet/ADF/Other*  | CER                          | WMD=-1.38 (-2.47, -0.28), P=0.014                     | Very low quality            |
|                                            |         | N/A (2RCTs)                         | 5:2 diet/ADF/Other*  | Regular diet                 | WMD=-3.24 (-4.55, -1.92), P<0.001                     | Very low quality            |
| Roman, 2019                                |         | 360 (5RCTs)                         | 5:2 diet/Other*      | CER/Regular diet             | MD=-0.26 (-1.14, 0.62), P=0.56                        | Low quality                 |
| Guerrero, 2021                             |         | 840 (13RCTs)                        | 5:2 diet/ADF/Other*  | CER/Regular diet             | Cohen's d and 95%CI=-0.38 (-3.25, -3.87) <sup>#</sup> | Very low quality            |
| He, 2021                                   |         | 607(8RCTs)                          | 5:2 diet/ADF/Other*  | CER/Regular diet             | MD=-0.65 (-1.36, 0.07), P=0.08                        | Moderate quality            |
| Schwingshackl, 2021                        |         | 743 (10RCTs)                        | 5:2 diet/ADF/Other*  | CER                          | MD=-0.66 (-1.14, -0.19), P=0.007                      | Moderate quality            |
|                                            |         | 279 (6RCTs)                         | 5:2 diet/ADF/Other*  | Regular diet                 | MD=-2.54 (-3.78, -1.31), P < 0.00001                  | Very low quality            |
| Cioffi, 2018                               | FFM     | 476 (7RCTs)                         | 5:2 diet/ADF/Other*  | CER/ Regular diet/No control | WMD= -0.22 (-1.01, 0.56), P=0.58                      | Moderate quality            |
| Harris and Hamilton, 2018                  |         | N/A (2RCTs)                         | 5:2 diet/ADF/Other*  | CER                          | WMD= -0.02 ( -0.80, 0.76), P=0.958                    | Low quality                 |
| Roman, 2019                                |         | 322 (4RCTs)                         | 5:2 diet/Other*      | CER/Regular diet             | MD=-0.86 (-1.62, -0.10), P=0.03                       | Low quality                 |
| Guerrero, 2021                             |         | 797 (12RCTs)                        | 5:2 diet/ADF/Other*  | CER/Regular diet             | Cohen's d and 95%CI=-0.39 (-1.51, -1.72) <sup>#</sup> | Very low quality            |
| He, 2021                                   |         | 607(8RCTs)                          | 5:2 diet/ADF/Other*  | CER/Regular diet             | MD= -0.39 (-0.85,0.06), P=0.09                        | Moderate quality            |

Abbreviations: ADF, alternate day fasting; BMI, body mass index; BP: blood pressure; CER, continuous energy restriction; CRP, C-reactive protein; CI, confidence interval; DBP, diastolic blood pressure; FM, fat mass; FFM, fat free mass; HDL-C: high-density lipoprotein cholesterol; HbA1c, glycated hemoglobin; IER, intermittent energy restriction; LDL-C, low-density lipoprotein cholesterol; MD, mean difference; N/A, not applicable; RCT, randomized controlled trial; SBP, systolic blood pressure; TC, total cholesterol; TG, triglycerides. WMD, weighted mean difference.

\*Not IER protocols prescribed in the inclusion criteria.

#P value was not available.
